# Supplementary material
Source: PubMed Central journal article supplement (PMC3115453)
Supplement: NIHMS291990-supplement-Supp_Fig_S1___Table_S1.pdf [file NIHMS291990-supplement-Supp_Fig_S1___Table_S1.pdf]

1 **Figure S1. Comparison of PrsA1 and PrsA2 reactivity with rabbit polyclonal**  
2 **antibody directed against PrsA2.** (A) Western blot analysis of decreasing amounts of  
3 purified PrsA2 and PrsA1 using rabbit polyclonal antibody directed against PrsA2. (B)  
4 Comparison of PrsA2 antibody sensitivity for PrsA2 versus PrsA1 based on densitometry  
5 of Western blot shown in panel A.

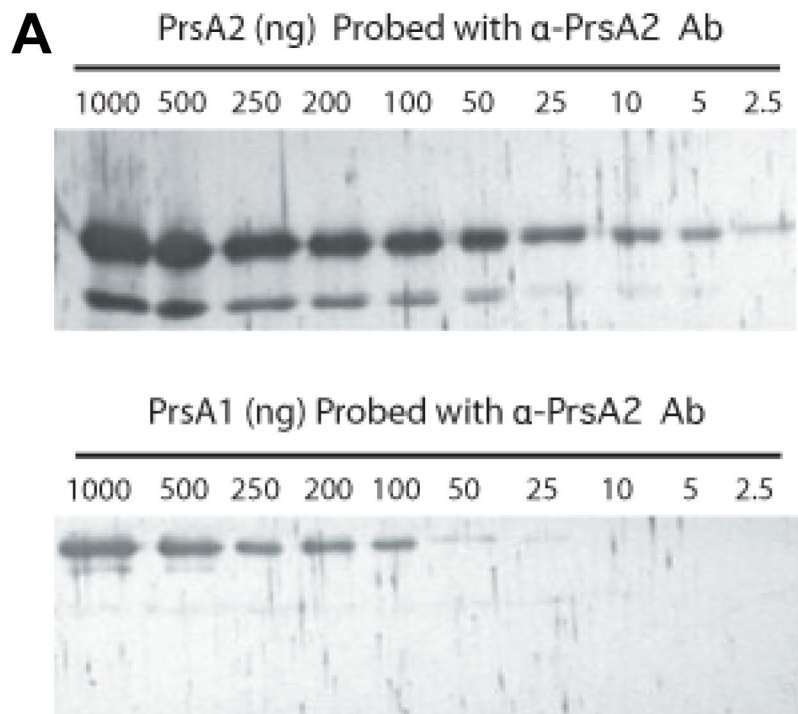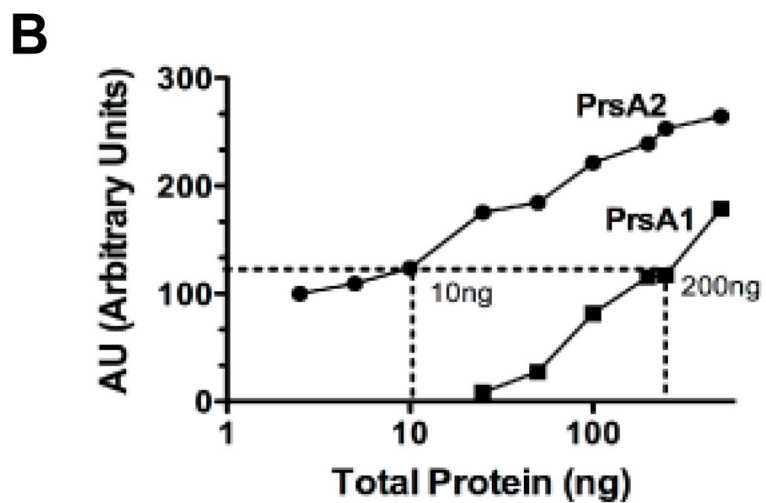

**Supplementary Table 1.** Oligonucleotides used in this work

|                              |                                            |        |
|------------------------------|--------------------------------------------|--------|
| <b>PrsA2 (N+C) construct</b> |                                            |        |
| NC-a                         | GCG- <u>GAGCTC</u> -CCTAAAATCAATCAACGAGCTC | (Sacl) |
| NC-b                         | TTTTTCAAAGTTGTTTTGTTTGCCAAGTTTCATAGTA      |        |
| NC-c                         | TACTATGAAACTTGGCAAACAAAAACAACCTTTTGAAAAA   |        |
| NC-d                         | GCG- <u>GGTACC</u> -TTCGTTTTATAATC         | (KpnI) |
| <b>P2N-P1P-P1C construct</b> |                                            |        |
| P2N-P1P-P1C-a                | GCG- <u>GAGCTC</u> -CCTAAAATCAATCAACGAGCTC | (Sacl) |
| P2N-P1P-P1C-b                | GCGAACAGTAATATCTGGTTGCCAAGTTTCATAGTA       | (Sacl) |
| P2N-P1P-P1C-c                | TACTATGAAACTTGGCAACCAGATATTACTGTTTCGC      |        |
| P2N-P1P-P1C-d                | GCG- <u>GGTACC</u> -TGGCGTGTGTTTTTGACG     | (KpnI) |
| <b>P1N-P1P-P2C construct</b> |                                            |        |
| P1N-P1P-P2C-a                | GCG- <u>GAGCTC</u> -CCTAAAATCAATCAACGAGCTC | (Sacl) |
| P1N-P1P-P2C-b                | TTTTTTTAATTTTGTCAATAAATAAAACACACTCCT       |        |
| P1N-P1P-P2C-c                | AGGAGTGTGTTTTATTTATTGACAAAATTAATAAAAAA     |        |
| P1N-P1P-P2C-d                | TTTTTCAAAGTTGTTTTGTTGTTTTCTTGACTAATTG      |        |
| P1N-P1P-P2C-e                | CAATTAGTCAAGAAAACAACAAAAACAACCTTTTGAAAAA   |        |
| P1N-P1P-P2C-f                | GCG- <u>GGTACC</u> -TTCGTTTTATAATC         | (KpnI) |
| <b>P1N-P2P-P1C construct</b> |                                            |        |
| P1N-P2P-P1C-a                | GCG- <u>GAGCTC</u> -CCTAAAATCAATCAACGAGCTC | (Sacl) |
| P1N-P2P-P1C-b                | TTTTTTTAATTTTGTCAATAAATAAAACACACTCCT       |        |
| P1N-P2P-P1C-c                | AGGAGTGTGTTTTATTTATTGACAAAATTAATAAAAAA     |        |
| P1N-P2P-P1C-d                | GCTTACAGTAATATCTGGTTCCCACGTTTTGTAGTA       |        |
| P1N-P2P-P1C-e                | TACTACAAAACGTGGGAACCAGATATTACTGTAAGC       |        |
| P1N-P2P-P1C-f                | TGCGTAAGTGCCTTTTTCTGCAGGTTTGTCCATTG        |        |
| P1N-P2P-P1C-g                | CAAATGGACAAACCTGCAGAAAAAGGCACTTACGCA       |        |
| P1N-P2P-P1C-h                | GCG- <u>GGTACC</u> -TGGCGTGTGTTTTTGACG     | (KpnI) |
| <b>P2N-P2P-P1C construct</b> |                                            |        |
| P2N-P2P-P1C-a                | GCG- <u>GAGCTC</u> -CCTAAAATCAATCAACGAGCTC | (Sacl) |
| P2N-P2P-P1C-b                | TGCGTAAGTGCCTTTTTCTGCAGGTTTGTCCATTG        |        |
| P2N-P2P-P1C-c                | CAAATGGACAAACCTGCAGAAAAAGGCACTTAC          |        |
| P2N-P2P-P1C-d                | GCG- <u>GGTACC</u> -TGGCGTGTGTTTTTGACG     | (KpnI) |
| <b>P1N-P2P-P2C construct</b> |                                            |        |
| P1N-P2P-P2C-a                | GCG- <u>GAGCTC</u> -CCTAAAATCAATCAACGAGCTC | (Sacl) |
| P1N-P2P-P2C-b                | TTTTTTTAATTTTGTCAATAAATAAAACACACTCCT       |        |
| P1N-P2P-P2C-c                | AGGAGTGTGTTTTATTTATTGACAAAATTAATAAAAAA     |        |

|                                                                  |                                                                          |        |
|------------------------------------------------------------------|--------------------------------------------------------------------------|--------|
| P1N-P2P-P2C-d                                                    | GCTTACAGTAATATCTGGTTCACGTTTTGTAGTA                                       |        |
| P1N-P2P-P2C-e                                                    | TACTACAAAACGTGGGAACCAGATATTACTGTAAGC                                     |        |
| P1N-P2P-P2C-f                                                    | GCG- <u>GGTACC</u> -TTCGTTTTATAATC                                       | (KpnI) |
| <b>P2N-P1P-P2C construct</b>                                     |                                                                          |        |
| P2N-P1P-P2C-a                                                    | GCG- <u>GAGCTC</u> -CCTAAAATCAATCAACGAGCTC                               | (Sacl) |
| P2N-P1P-P2C-b                                                    | GCGAACAGTAATATCTGGTTGCCAAGTTTCATAGTA                                     |        |
| P2N-P1P-P2C-c                                                    | TACTATGAAACTTGGCAACCAGATATTACTGTTCGC                                     |        |
| P2N-P1P-P2C-d                                                    | TTCAAAAGTTGTTTTTGTGTTTTCTTGACTAATTG                                      |        |
| P2N-P1P-P2C-e                                                    | CAATTAGTCAAGAAAACAACAAAACAACCTTTTGAA                                     |        |
| P2N-P1P-P2C-f                                                    | GCG- <u>GGTACC</u> -TTCGTTTTATAATC                                       | (KpnI) |
| <b>PrsA2 (D174A), (F77A), (F77A + F102A) constructs</b>          |                                                                          |        |
| 174-D to A                                                       | Phos-GGCAACCAGATATTACTGTAAGCGCTATTCTTGT<br>AGCTGATGAAAACA                |        |
| 77-F to A                                                        | Phos-AGCGACGAAGATGTTGACAAGAAAGCCAACGAG<br>TATAAATCACAATACGGA             |        |
| 77-A to F                                                        | Phos-AGCGACGAAGATGTTGACAAGAAATTCAACGAG<br>TATAAATCACAATACGGA             |        |
| 105-Q to A                                                       | Phos-TTAACTGAGAAATCTTTCAAAGCGCACTTAAGT<br>ACAACCTGTTAGTTCAA              |        |
| 102-F to A                                                       | Phos-CAAAGTGGCTTAACTGAGAAATCTGCCAAAAGC<br>CAACTTAAGTACAAC                |        |
| pPL2 common                                                      | Phos-AAGTAGATGCTTTTTTCACACTAAAACAGATG<br>AAAATACCACAAATT                 |        |
| <b>PrsA2 (DKPATKTTFEKDKKA → VKKTEKGTYAKEKAN)</b>                 |                                                                          |        |
| P1→P2 #3 - a                                                     | GCG- <u>GAGCTC</u> -CCTAAAATCAATCAACGAGCTC                               | (Sacl) |
| P1→P2 #3 - b                                                     | TACGTTGGCTTTTTCTTTTGCGTAAGTGCCTTTTTCTGTTTTCTT<br>GTCCATTTGGATGATGTGGTA   |        |
| P1→P2 #3 - c                                                     | AAGAAAACAGAAAAGGCACTTACGCAAAAAGAAAAGCCAAC<br>GTAAAAGCTTCTTACCTTGAGTCTCAA |        |
| P1→P2 #3 - d                                                     | GCG- <u>GGTACC</u> -TTCGTTTTATAATC                                       | (KpnI) |
| <b>PrsA2 (QKTLKKEYK → TAALKKELK)</b>                             |                                                                          |        |
| P1→P2 #4 - a                                                     | GCG- <u>GAGCTC</u> -CCTAAAATCAATCAACGAGCTC                               | (Sacl) |
| P1→P2 #4 - b                                                     | TTTTAACTCTTTTTTGAGTGCAGCTGTCATGTTCTC<br>AGTAGTTAATTGAGA                  |        |
| P1→P2 #4 - c                                                     | ACAGCTGCACTCAAAAAGAGTTAAAAGATGCT<br>AACGTGAAAGTGGAAGAC                   |        |
| P1→P2 #4 - d                                                     | GCG- <u>GGTACC</u> -TTCGTTTTATAATC                                       | (KpnI) |
| <b>PrsA2, PrsA2 (D174A), PrsA2 (N+C), PrsA1 6-his constructs</b> |                                                                          |        |
| PrsA2-6hisA                                                      | GCG- <u>CCATGG</u> -CC-TGCGGTGGCGGCGGAGAT                                | (NcoI) |

|             |                                           |         |
|-------------|-------------------------------------------|---------|
| PrsA2-6hisB | GCG- <u>AGATCT</u> -TTTAGATGAATCGCTATC    | (BglII) |
| PrsA1-6hisA | GCG- <u>CCATGG</u> -CC-TGTGGAAGTAGCGCTGTT | (NcoI)  |
| PrsA1-6hisB | GCG- <u>AGATCT</u> -GTTAGATGTAGTCGTTGA    | (BglII) |
